# Supplementary material for: Unveiling Semiconductor Nanostructured Based Holmium-Doped ZnO: Structural, Luminescent and Room Temperature Ferromagnetic Properties
Source: MDPI journal article supplement (doi:10.3390/nano11102611), 2021-10-04

## *Supporting Information (SI)*

# **Unveiling Semiconductor Nanostructured Based Holmium-Doped ZnO Structural, Luminescent and Room Temperature Ferromagnetic Properties**

G. L. Kabongo <sup>1,\*</sup>, G. H. Mhlongo <sup>2</sup> and M. S. Dhlamini <sup>1</sup>

<sup>1</sup> Department of Physics, University of South Africa, Pretoria P.O. Box 392, 0003, South Africa; [dhlaminims@hotmail.com](mailto:dhlaminims@hotmail.com)

<sup>2</sup> CSIR-National Centre for Nano-Structured Materials, Pretoria P.O. Box 395, 0001, South Africa; [gmlongo@csir.co.za](mailto:gmlongo@csir.co.za)

\* Correspondence: [geekale@gmail.com](mailto:geekale@gmail.com)

**Figure S1:** SEM image used to conduct EDS mapping

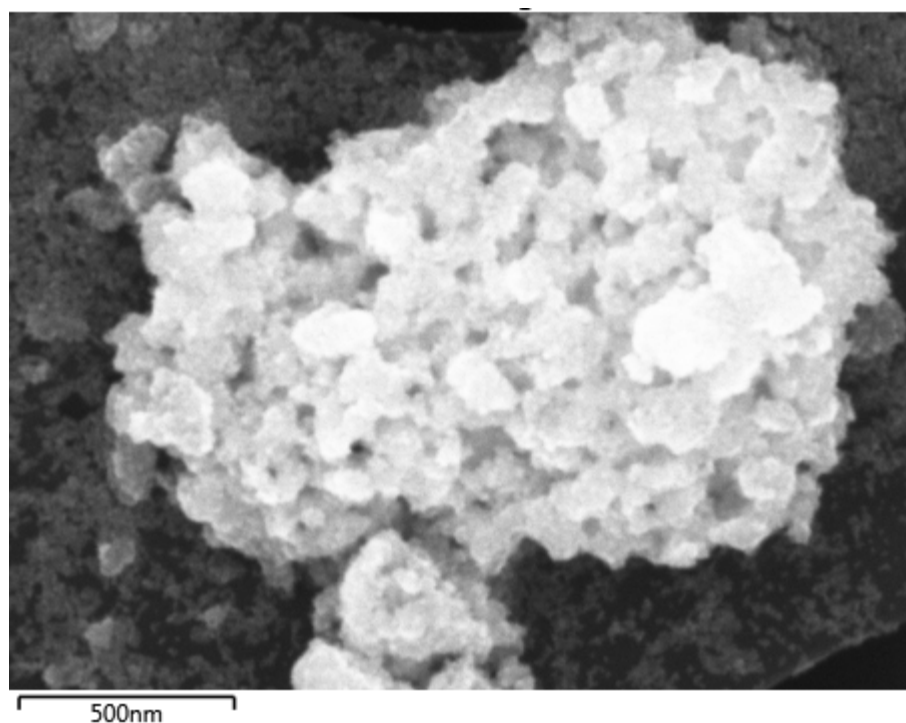

**Figure S2:** HRTEM images for (A) un-doped and (B) (0.5 mol%)  $\text{Ho}^{3+}$ -doped ZnO nanocrystals.

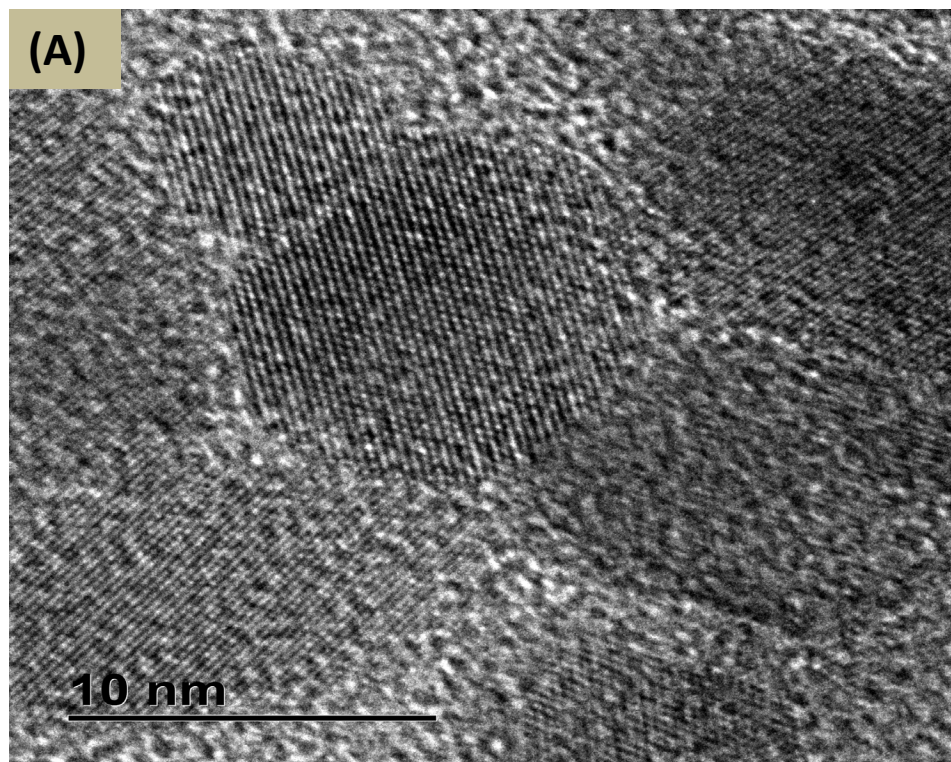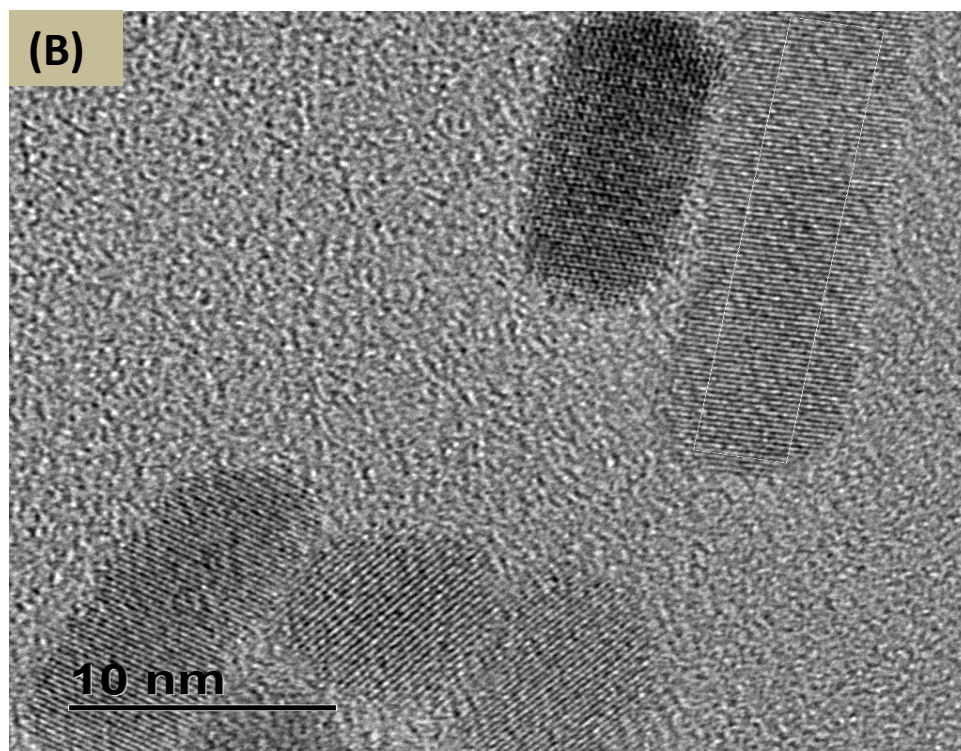

Supplement: s1 [file s1]
